# Supplementary material
Source: MDPI journal article supplement (https://www.mdpi.com/2073-4395/13/2/306)
Supplement: s1 [file s1]

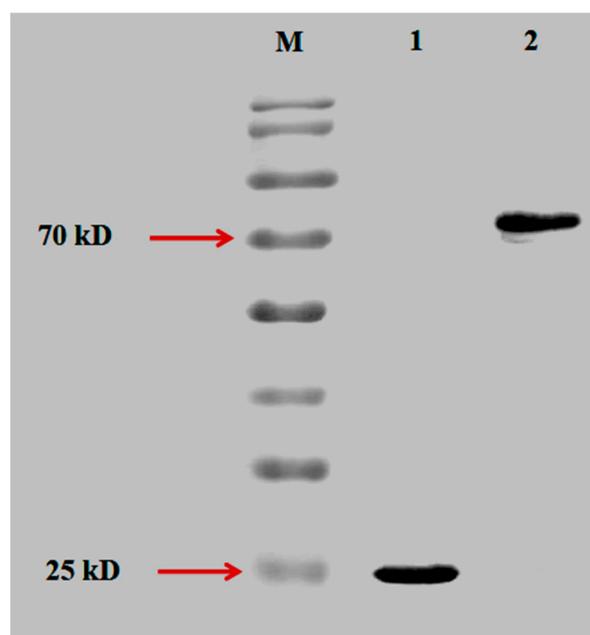

**Figure S1.** MdUGT83K2 purified protein SDS-PAGE gel. 1, GST, 2, MdUGT83K2-GST.

**Table S1.** Primer sequence.

| Name      | Primer                                                             | Features                      |
|-----------|--------------------------------------------------------------------|-------------------------------|
| MdUGT83L3 | qF: TGCTGATCAGGGTATCGGGT<br>qR: TTTGGTGCCAACTGAATCGC               | For Real-time PCR             |
| MdUGT83L4 | qF: TGCCCACCATGAAACCTGAA<br>qR: AGGTGAATGTTGCTGGCTCA               | For Real-time PCR             |
| MdUGT83L5 | qF: CACAAACGCATCGCCCTGG<br>qR: AACTTCCCCGGCATGACTC                 | For Real-time PCR             |
| MdUGT83L6 | qF: GTGACAAGGTCACTTG<br>qR: CAACCGAGTTCCTGCC                       | For Real-time PCR             |
| MdUGT83L7 | qF: CAAACGCATCGTGAACGCCT<br>qR: GTCATTCCTGTCCTCCTTGGG              | For Real-time PCR             |
| MdUGT83L8 | qR: CCAAAGTACATTGATG<br>qR: GTCAACATTCTGGCTC                       | For Real-time PCR             |
| MdUGT83K2 | qF: TTTGTGGGTGGTCAGGGATG<br>qR: CCAAGCTACTATCCGCCAC                | For Real-time PCR             |
| MdEF-1a   | qF: AACTGGTCTGACTACTGA<br>qR: TGACAGCAACATTCTTAAC                  | For Real-time PCR             |
| MdUGT83K2 | cF: <u>GGATCC</u> ATGGTCAATCCACATG<br>cR: TTATCGTTTCATCCAATCAAGCTT | For full-length amplification |
